# Supplementary material
Source: publisher figshare collection journal article supplement (https://frontiersin.figshare.com/ndownloader/files/22124019)
Supplement: Supplementary file 1 [file 22124019]

## Sheet: Explanatory Notes
Data matrices analyzed by Kenchington et al. “The meso- and bathypelagic fishes in a large submarine canyon: Assemblage structure and trophic role of the principal species in The Gully”
This workbook contains two matrices of catch data, one by weight and the other by numbers. Each has data on 19 species taken by 148 sets. Details of the sets are included.
Entries highlighted by gold shading are those reconstructured from the corresponding entry in the opther matrix, using the individual average weight of the species in question.
For a full explanation, see the Technical Reports by Kenchington et al. (2009, 2014a,b, 2018) that are cited in the primary paper.

## Sheet: By Weight for Analysis
Year	Station	Stratum	Diel Phase	Set Description	Year-Set	Nemichthys scolopaceus	Serrivomer beanii	Eurypharynx pelecanoides	Bathylagus euryops	Chauliodus sloani	Malacosteus niger	Stomias boa	Arctozenus risso	Benthosema glaciale	Ceratoscopelus maderensis	Hygophum hygomii	Lampanyctus macdonaldi	Lobianchia dofleini	Myctophum punctatum	Notoscopelus kroyeri	Notoscopelus resplendens	Scopelogadus beanii	Anoplogaster cornuta	Melanostigma atlanticum
2007	Offshore	250	N	O 250 N	2007_07	30	0	0	0	25	0	37	82	399	5	49	0	125	0	8	110	0	0	0
2007	Offshore	250	D	O 250 D	2007_09	10	5	0	0	0	0	65	25	1	0	1	0	1	0	0	0	0	0	0
2007	Offshore	1250	N	O 1250 N	2007_12	21	594	187	93	336	34	155	47	865	1	635	0	7	2	0	449	190	0	0
2007	Offshore	>1250	N	O Extra N	2007_13	7	500	485	135	219	6	68	31	731	3	103	37	11	1	0	44	82	70	0
2007	Offshore	750	D	O 750 D	2007_14	140	165	0	0	580	55	420	90	705	1	24	0	7	1	0	2	30	40	0
2007	Offshore	1250	D	O 1250 D	2007_15	65	785	170	46	400	33	245	55	706	0.4	4	0	3	0	0	27	607	0	0
2007	Offshore	750	N	O 750 N	2007_18	59	208	8	12	390	157	273	37	977	17	85	0	19	4	0	157	512	93	0
2007	Main	250	N	M 250 N	2007_19	358	12	0	0	0	0	170	111	489	56	0	0	0	48	0	0	0	0	0
2007	Main	750	D	M 750 D	2007_21	174	180	8	28	15	10	660	78	787	12	0	0	0	43	0	0	2	0	20
2007	Main	1250	D	M 1250 D	2007_22	17	150	95	100	135	225	500	35	1085	0	0	25	0	14	1	0	182	0	13
2007	Main	750	D	M 750 D	2007_23	300	185	0	14	30	0	695	105	1095	25	0	0	0	67	0	0	0	100	0
2007	Main	250	D	M 250 D	2007_24	0	0	0	0	0	0	41	32	73	0	0	0	0	30	0	0	0	0	0
2007	Main	1250	N	M 1250 N	2007_26	142	358	25	81	406	305	596	86	583	5	0	25	0	193	0	0	131	142	8
2007	Main	750	N	M 750 N	2007_27	394	475	5	45	5	12	625	43	1023	95	0	28	0	45	66	0	0	0	0
2007	Main	1250	N	M 1250 N	2007_28	204	323	27	73	64	150	590	12	294	16	0	0	0	22	0	0	203	42	0
2007	Main	1250	D	M 1250 D	2007_29	55	575	80	184	325	70	625	35	1141	4	0	45	0	81	1	1	243	0	8
2007	Main	750	D	M 750 D	2007_30	325	325	0	40	100	40	835	120	735	6	0	0	0	65	0	0	2	0	11
2007	Main	250	D	M 250 D	2007_31	0	0	0	0	0	0	0	47	14	0	0	0	1	29	0	8	0	0	0
2007	Main	750	N	M 750 N	2007_33	52	202	110	20	99	0	360	74	597	125	0	0	0	101	39	0	0	0	4
2007	Main	1250	N	M 1250 N	2007_34	314	455	90	90	245	132	524	22	940	49	0	25	0	24	40	1	8	65	8
2007	Main	1250	D	M 1250 D	2007_35	340	380	16	85	230	60	480	26	1047	0	0	0	0	22	3	2	145	30	5
2007	Main	250	D	M 250 D	2007_36	86	7	0	0	1	0	25	22	0	0	0	0	0	10	0	0	0	0	0
2007	Wall	750	D	W 750 D	2007_38	195	245	0	20	225	36	840	114	501	8	0	0	0	90	34	0	0	27	0
2007	Main	250	N	M 250 N	2007_41	203	12	0	0	3	0	177	79	855	133	0	0	0	67	132	0	0	0	0
2007	Main	750	N	M 750 N	2007_42	70	185	0	81	96	15	695	16	867	138	0	18	0	143	77	0	0	0	0
2007	Main	250	N	M 250 N	2007_43	111	0	0	0	0	0	65	120	803	159	0	0	0	39	110	0	0	0	0
2007	Head	750	D	H 750 D	2007_44	0	165	8	45	49	90	54	90	135	2	0	55	0	56	4	0	0	0	1
2007	Head	250	D	H 250 D	2007_45	0	0	0	0	0	0	0	28	0	0	0	0	0	33	25	0	0	0	0
2007	Head	750	N	H 750 N	2007_49	0	16	0	3	157	1	10	68	108	40	0	2	0	126	0	0	0	0	1
2007	Head	250	N	H 250 N	2007_51	0	0	0	0	6	0	99	13	6	5	0	0	0	8	0	0	0	0	0
2007	Head	750	N	H 750 N	2007_52	0	60	0	15	0	0	12	67	111	7	0	75	0	18	0	0	0	0	6
2007	Wall	250	D	W 250 D	2007_53	0	0	0	0	0	0	0	10	1	2	0	0	0	42	0	0	0	0	0
2007	Wall	750	D	W 750 D	2007_54	52	60	1	24	184	9	565	78	557	2	0	6	0	132	16	0	29	42	47
2007	Wall	750	D	W 750 D	2007_56	63	168	3	28	0	87	372	87	541	3	0	0	0	51	6	0	0	0	38
2007	Wall	250	N	W 250 N	2007_58	57	7	0	0	0	0	64	35	124	88	0	0	0	46	0	0	0	0	0
2007	Wall	750	N	W 750 N	2007_59	66	269	0	19	117	99	316	13	367	2	0	1	0	43	4	0	0	0	0
2007	Wall	250	N	W 250 N	2007_60	189	0	1	0	0	0	133	29	70	79	0	0	0	27	17	0	0	0	7
2007	Wall	750	N	W 750 N	2007_61	42	613	25	5	47	62	365	57	270	43	0	0	0	15	14	0	0	0	25
2007	Deep	750	D	D 750 D	2007_62	121	428	1	63	136	32	259	19	456	0	0	6	0	18	0	1	69	0	1
2007	Deep	1250	D	D 1250 D	2007_64	232	653	56	67	319	156	275	9	352	0	0	0	0	2	2	0	669	0	0
2007	Deep	750	D	D 750 D	2007_65	161	194	0	122	87	0	363	1	606	6	0	0	0	17	8	0	525	47	0
2007	Deep	250	D	D 250 D	2007_67	0	0	0	0	0	0	0	0	0	0	0	0	1	2	0	0	0	0	0
2007	Deep	250	N	D 250 N	2007_69	39	1	0	0	20	0	28	150	198	64	0	0	0	62	31	0	0	0	0
2007	Deep	1250	N	D 1250 N	2007_70	75	290	10	180	765	37	170	19	664	36	0	8	0	41	33	0	804	137	0
2007	Deep	750	N	D 750 N	2007_71	90	375	69	67	305	89	273	22	411	60	0	33	0	30	27	0	410	0	0
2007	Deep	1250	N	D 1250 N	2007_72	326	596	136	66	365	177	117	8	636	46	0	0	0	60	34	0	635	346	0
2007	Deep	750	N	D 750 N	2007_76	301	292	26	61	209	9	394	17	621	54	0	50	0	40	41	0	344	0	0
2007	Deep	250	N	D 250 N	2007_77	95	7	0	0	179	0	109	17	273	78	0	0	0	33	78	0	0	0	0
2007	Main	>1250	D	M Extra D	2007_80	176	598	70	308	329	36	279	13	1172	3	0	110	0	23	5	0	270	0	0
2007	Head	750	D	H 750 D	2007_81	26	134	1	85	44	263	157	24	277	0	0	64	0	44	15	0	0	0	44
2007	Head	>750	N	H Extra N	2007_83	0	259	26	163	133	195	374	17	430	9	0	143	0	125	0	0	0	0	33
2007	Head	250	N	H 250 N	2007_84	18	0	0	0	0	0	8	13	61	0	0	0	0	7	0	0	0	0	8
2007	Head	250	N	H 250 N	2007_85	0	0	0	0	0	0	0	27	22	3	0	0	0	7	12	0	0	0	13
2007	Head	750	D	H 750 D	2007_86	0	32	0	6	42	0	0	244	156	3	0	161	0	34	18	0	0	0	20
2008	Deep	750	N	D 750 N	2008_01	64	100	0	81	302	34	106	67	660	17	83	2	2	2	0	57	260	0	0
2008	Deep	750	D	D750 D	2008_02	173	15	0	47	7	40	398	12	391	2	5	30	1	0	0	9	6	37	0
2008	Deep	1250	N	D 1250 N	2008_06	68	524	33	82	267	49	315	43	1064	19	36	43	1	3	3	102	2401	0	0
2008	Deep	250	N	D 250 N	2008_07	151	64	0	66	46	0	37	85	598	12	54	13	1	1	5	64	0	0	0
2008	Deep	1250	D	D 1250 D	2008_08	95	492	50	152	363	20	163	11	571	3	2	0	2	0	0	20	2086	134	0
2008	Deep	750	N	D 750 N	2008_11	154	215	0	20	231	28	185	60	475	9	48	0	1	1	0	72	612	45	0
2008	Main	1250	D	M 1250 D	2008_14	148	335	26	57	442	102	212	89	414	3	0	63	0	39	4	8	513	36	1
2008	Main	750	D	M 750 D	2008_15	271	455	0	36	30	0	349	49	228	2	0	0	0	0	15	1	7	56	54
2008	Main	750	N	M 750 N	2008_19	330	380	0	82	110	17	291	25	643	27	1	0	0	15	3	4	1	0	26
2008	Main	1250	N	M 1250 N	2008_20	116	823	0	246	334	210	345	13	355	41	13	82	0.45	20	3	82	399	0	11
2008	Main	250	N	M 250 N	2008_21	130	0	0	3	12	0	57	30	1305	41	0	0	1	2	18	6	0	0	0
2008	Main	250	D	M 250 D	2008_22	46	0	0	0	0	73	0	0	31	1	0	0	0	0	0.25	0	0	0	0
2008	Head	750	D	H 750 D	2008_23	0	672	5	16	115	0	285	28	95	0	0	21	0	30	52	0	4	0	94
2008	Head	250	N	H 250 N	2008_27	0	0	0	0	0	0	0	0	11	0	0	0	0	6	0	0	0	0	0
2008	Head	750	N	H 750 N	2008_28	0	305	25	33	74	109	0	78	42	16	0	21	0	14	0	0	1	0	15
2008	Head	250	N	H 250 N	2008_29	0	0	0	0	0	0	0	30	1	0	0	0	0	0	0	0	0	0	0
2008	Head	750	D	H 750 D	2008_31	0	148	31	22	189	36	57	55	50	0	0	18	0	7	0	0	24	0	2
2008	Head	250	D	H 250 D	2008_32	0	0	0	0	0	7	19	0	0	0	0	0	0	0	12	0	0	0	0
2008	Main	750	N	M 750 N	2008_36	159	189	0	12	72	0	542	22	1291	25	13	0	0.3	6	15	25	87	0	0
2008	Main	1250	N	M 1250 N	2008_37	254	325	8	178	430	202	527	19	765	16	76	0	1	6	9	48	184	0	24
2008	Main	250	N	M 250 N	2008_38	291	6	0	16	0	0	171	58	474	8	1	0	0	0	4	1	0	0	0
2008	Main	750	D	M 750 D	2008_39	215	187	0	51	0	21	549	73	530	9	9	17	0	11	31	1	1	0	0
2008	Deep	750	N	D 750 N	2008_43	116	250	0	45	297	47	295	28	440	29	128	16	10	0	4	25	682	45	0
2008	Deep	250	N	D 250 N	2008_44	78	8	0	3	28	19	42	57	274	51	115	0	6	3	27	38	45	0	0
2008	Deep	750	D	D 750 D	2008_46	190	364	0	39	491	100	270	20	331	7	33	47	2	0.3	1	11	44	0	0
2008	Deep	250	D	D 250 D	2008_47	27	0	0	0	2	0	54	0.25	24	0	0	0	0	0	0	0	0	0	0
2008	Deep	1750	N	D 1750 N	2008_49	148	1121	244	242	168	184	193	16	399	10	102	124	6	1	24	17	744	0	0
2008	Deep	1250	N	D 1250 N	2008_51	62	610	74	109	296	53	205	22	232	45	97	25	10	2	5	16	721	0	0
2008	Deep	1250	D	D 1250 D	2008_52	175	662	186	173	608	67	265	15	386	10	16	65	16	0.4	1	4	1399	0	0
2008	Main	1250	D	M 1250 D	2008_53	398	207	46	60	380	70	585	7	315	3	10	69	0	13	17	0	116	156	0
2009	Slope	750	D	S 750 D	2009_03	130	253	0	43	376	11	305	46	539	0	29	0	11	2	0	2	116	0	0
2009	Deep	1750	N	D 1750 N	2009_04	131	800	166	275	610	75	160	51	947	31	4	64	24	1	0	32	1162	49	0
2009	Deep	750	N	D 750 N	2009_05	143	315	0	0	260	0	357	5	254	25	236	7	84	22	0	94	198	0	0
2009	Deep	1250	D	D 1250 D	2009_06	209	1660	64	244	526	139	486	60	529	2	35	32	13	7	0	11	2506	183	3
2009	Deep	250	N	D 250 N	2009_10	137	43	0	17	60	0	202	98	637	177	280	0	80	8	48	19	59	0	0
2009	Deep	1250	N	D 1250 N	2009_11	193	851	74	174	306	0	442	11	482	17	271	0	72	3	0	45	1083	34	0
2009	Deep	750	N	D 750 N	2009_12	252	257	1	196	220	0	543	16	531	18	136	0	12	9	0	49	97	0	0
2009	Deep	250	D	D 250 D	2009_13	121	0	0	0	0	0	93	0	33	0	11	0	0	0	0	0	0	0	0
2009	Main	250	N	M 250 N	2009_17	23	4	0	0	0	0	6	27	588	87	2	0	2	57	10	0	0	0	0
2009	Main	750	N	M 750 N	2009_18	220	311	0	37	78	36	187	57	551	61	2	0	2	33	13	0	69	0	0
2009	Main	1250	N	M 1250 N	2009_19	454	1022	136	304	379	12	213	21	960	5	0	0	4	10	3	7	990	176	2
2009	Deep	1250	D	D 1250 D	2009_20	151	873	90	202	549	6	998	43	856	0	74	0	37	11	6	5	2145	0	0
2009	Main	250	N	M 250 N	2009_25	172	3	0	0	0	0	66	14	855	73	1	0	1	45	24	0	0	0	0
2009	Deep	1250	N	D 1250 N	2009_26	61	989	39	331	590	0	227	29	936	29	55	19	54	0	28	0	1607	0	0
2009	Main	750	N	M 750 N	2009_27	429	217	18	59	155	0	552	3	758	12	0	0	2	15	8	0	36	0	0
2009	Deep	1750	N	D 1750 N	2009_32	112	779	452	413	558	33	566	15	1010	8	87	74	51	0	13	10	1609	0	0
2009	Wall	250	N	W 250 N	2009_33	167	59	17	0	86	0	21	30	544	22	1	35	1	81	60	0	0	0	0
2009	Main	250	D	M 250 D	2009_34	98	0	0	0	0	0	0	2	20	0	0	0	0	32	13	0	0	0	0
2009	Main	750	D	M 750 D	2009_35	571	97	0	17	79	1	616	36	350	0	0	20	1	81	10	0	0	0	0
2009	Deep	>1750		D Extra X	2009_38	144	1103	160	231	585	66	315	31	889	13	161	28	63	0	6	54	1939	317	0
2009	Main	1250	N	M 1250 N	2009_39	368	448	146	128	498	58	514	13	1081	36	1	33	1	8	10	0	1294	40	0
2009	Main	750	D	M 750 D	2009_40	1020	72	3	67	121	13	679	29	397	3	0	0	1	61	3	0	0	0	1
2009	Wall	750	D	W 750 D	2009_41	507	165	6	50	140	0	916	47	343	9	0	0	0	82	2	0	1	0	19
2009	Deep	>1750		D Extra X	2009_43	158	648	327	132	483	0	182	17	584	5	25	31	37	0	0	38	1240	36	0
2009	Wall	750	N	W 750 N	2009_44	513	134	13	38	12	103	393	24	417	64	0	0	1	66	25	0	0	0	10
2009	Wall	750	N	W 750 N	2009_45	686	231	0	137	32	49	578	7	538	27	0	0	0	89	18	0	1	0	2
2009	Main	1250	D	M 1250 D	2009_46	884	1095	162	237	541	154	577	19	653	2	0	40	0	60	12	0	955	86	1
2009	Head	250	N	H 250 N	2009_52	92	16	17	31	6	0	116	6	29	0	0	0	0	21	0	0	0	0	0
2009	Head	750	N	H 750 N	2009_54	38	394	82	49	107	206	0	45	166	0	0	32	0	24	59	0	17	58	76
2009	Head	250	N	H 250 N	2009_55	115	20	0	0	41	0	0	8	0	0	0	0	0	0	0	0	0	0	0
2009	Head	750	D	H 750 D	2009_56	0	144	6	119	4	34	0	146	151	0	0	24	0	28	0	0	0	71	94
2009	Head	250	D	H 250 D	2009_57	0	0	0	0	0	0	10	0	1	0	0	13	0	43	0	0	0	0	13
2009	Head	750	D	H 750 D	2009_58	22	425	84	85	57	169	0	132	73	0	0	91	0	0	0	0	0	0	134
2010	Slope	750	D	S 750 D	2010_02	119	795	7	32	461	40	71	9	119	9	0	24	2	0	0	0	15	43	0
2010	Deep	250	N	D 250 N	2010_04	42	4	0	0	11	0	49	19	423	4	0	0	0	0	0	0	0	0	0
2010	Deep	750	N	D 750 N	2010_05	33	119	0	16	120	127	111	10	375	0	0	0	0	0	0	0	106	0	0
2010	Deep	250	N	D 250 N	2010_06	33	7	0	0	3	0	25	0	2	0	0	0	0	0	0	0	0	0	0
2010	Main	750	D	M 750 D	2010_08	86	145	7	44	26	0	7	0	84	0	0	0	0	0	0	0	1	0	0
2010	Main	250	D	M 250 D	2010_09	102	11	0	0	0	0	0	2	1	0	0	0	0	0	0	0	0	0	0
2010	Main	750	D	M 750 D	2010_10	100	153	0	75	237	52	95	6	245	1	0	0	0	0	0	0	91	0	0
2010	Deep	1250	N	D 1250 N	2010_11	274	783	113	154	345	39	93	14	346	2	0	0	0	3	0	0	142	155	0
2010	Main	1250	D	M 1250 D	2010_14	635	695	8	118	343	62	25	2	91	0	0	0	0	0	0	0	93	59	21
2010	Deep	750	N	D 750 N	2010_16	201	360	25	158	256	128	137	14	252	4	0	0	0	0	0	0	174	67	0
2010	Deep	250	N	D 250 N	2010_17	212	54	3	0	20	0	19	8	160	16	0	0	0	0	0	0	43	0	0
2010	Deep	1250	N	D 1250 N	2010_18	125	223	25	261	382	120	71	4	125	0	0	19	0	0	0	0	177	92	0
2010	Head	250	D	H 250 D	2010_22	214	20	0	0	35	0	0	0	5	0	0	0	0	0	24	0	0	0	8
2010	Main	250	N	M 250 N	2010_23	297	1	0	0	10	0	20	9	677	5	0	15	0	0	0	0	0	0	8
2010	Main	750	N	M 750 N	2010_24	186	158	0	165	172	7	55	6	333	1	0	8	0	0	0	0	5	0	3
2010	Main	1250	N	M 1250 N	2010_25	577	968	11	138	251	49	25	1	203	3	0	0	0	0	25	0	79	68	6
2010	Head	750	D	H 750 D	2010_29	546	94	0	48	13	0	0	11	4	0	0	0	0	0	0	0	0	0	10
2010	Head	750	D	H 750 D	2010_30	55	0	9	0	0	0	0	8	0	0	0	0	0	0	0	0	0	0	0
2010	Main	750	N	M 750 N	2010_31	47	262	5	89	240	12	37	1	139	0	0	0	0	0	0	0	19	0	0
2010	Main	250	N	M 250 N	2010_32	84	0	0	0	0	0	0	1	116	0	0	0	0	0	0	0	0	0	0
2010	Main	1250	N	M 1250 N	2010_33	240	334	38	128	206	93	44	1	172	0	0	0	0	0	0	0	54	0	21
2010	Deep	>1750	D	D Extra D	2010_35	106	376	436	307	359	43	21	1	256	0	0	0	0	0	5	0	197	141	0
2010	Head	750	N	H 750 N	2010_36	54	28	123	0	39	26	34	0	17	0	0	0	0	0	0	0	0	0	6
2010	Head	250	N	H 250 N	2010_39	33	6	0	0	0	0	0	0	0	0	0	0	0	0	0	0	0	0	3
2010	Head	750	N	H 750 N	2010_40	521	97	0	9	16	0	0	0	2	0	0	0	0	0	0	0	0	0	29
2010	Deep	1750	D	D 1750 D	2010_43	161	798	163	293	438	24	75	0	242	6	0	0	0	0	0	0	106	0	3
2010	Deep	750	D	D 750 D	2010_44	136	510	0	107	304	22	40	1	292	0	0	0	0	0	0	0	10	0	0
2010	Deep	1750	N	D 1750 N	2010_45	110	2018	63	311	744	77	77	3	762	6	0	137	0	0	0	0	240	35	0
2010	Head	250	N	H 250 N	2010_46	95	57	70	0	65	0	29	1	22	2	0	0	0	0	0	0	0	0	0
2010	Deep	1750	D	D 1750 D	2010_50	151	1187	107	480	569	198	58	0	281	0	0	0	0	0	0	0	582	233	0
2010	Deep	1750	N	D 1750 N	2010_51	121	1964	303	218	974	137	123	5	733	1	0	0	0	0	0	0	460	67	0

## Sheet: By Number for Analysis
Year	Station	Stratum	Diel Phase	Set Description	Year-Set	Nemichthys scolopaceus	Serrivomer beanii	Eurypharynx pelecanoides	Bathylagus euryops	Chauliodus sloani	Malacosteus niger	Stomias boa	Arctozenus risso	Benthosema glaciale	Ceratoscopelus maderensis	Hygophum hygomii	Lampanyctus macdonaldi	Lobianchia dofleini	Myctophum punctatum	Notoscopelus kroyeri	Notoscopelus resplendens	Scopelogadus beanii	Anoplogaster cornuta	Melanostigma atlanticum
2007	Offshore	250	N	O 250 N	2007_07	11	0	0	0	7	0	4	81	438	5	30	0	215	0	11	95	0	0	0
2007	Offshore	250	D	O 250 D	2007_09	2	1	0	0	0	0	6	16	2	0	9	0	2	0	0	0	0	0	0
2007	Offshore	1250	N	O 1250 N	2007_12	3	25	5	8	25	1	10	31	955	3	200	0	9	2	0	306	11	0	0
2007	Offshore	>1250	N	O Extra N	2007_13	2	22	8	9	13	1	8	19	347	2	67	4	17	3	0	29	3	1	0
2007	Offshore	750	D	O 750 D	2007_14	16	38	0	0	42	4	35	36	564	1	17	0	17	4	0	1	3	1	0
2007	Offshore	1250	D	O 1250 D	2007_15	12	58	12	4	17	2	25	25	267	2	3	0	5	0	0	21	27	0	0
2007	Offshore	750	N	O 750 N	2007_18	7	27	2	1	25	5	18	17	781	30	51	0	34	1	0	120	21	2	0
2007	Main	250	N	M 250 N	2007_19	12	5	0	0	0	0	13	40	417	25	0	0	0	18	0	0	0	0	0
2007	Main	750	D	M 750 D	2007_21	6	12	1	11	1	1	17	20	415	4	0	0	0	9	0	0	1	0	5
2007	Main	1250	D	M 1250 D	2007_22	1	9	6	20	4	6	32	9	867	0	0	3	0	5	1	0	8	0	1
2007	Main	750	D	M 750 D	2007_23	7	19	0	5	3	0	43	25	527	11	0	0	0	20	0	0	0	1	0
2007	Main	250	D	M 250 D	2007_24	0	0	0	0	0	0	3	12	52	0	0	0	0	15	0	0	0	0	0
2007	Main	1250	N	M 1250 N	2007_26	4	20	3	5	10	11	28	12	230	2	0	2	0	32	0	0	7	2	2
2007	Main	750	N	M 750 N	2007_27	8	15	1	5	3	3	39	10	472	39	0	1	0	21	7	0	0	0	0
2007	Main	1250	N	M 1250 N	2007_28	7	20	1	5	4	4	34	4	196	7	0	0	0	8	0	0	12	1	0
2007	Main	1250	D	M 1250 D	2007_29	1	17	5	21	16	1	27	12	554	1	0	5	0	18	1	1	12	0	1
2007	Main	750	D	M 750 D	2007_30	7	14	0	11	6	2	38	25	588	2	0	0	0	23	0	0	1	0	2
2007	Main	250	D	M 250 D	2007_31	0	0	0	0	0	0	0	14	12	0	0	0	6	11	0	2	0	0	0
2007	Main	750	N	M 750 N	2007_33	1	15	6	5	3	0	15	18	414	51	0	0	0	48	35	0	0	0	1
2007	Main	1250	N	M 1250 N	2007_34	6	28	2	6	11	8	42	10	627	20	0	2	0	15	48	1	1	1	1
2007	Main	1250	D	M 1250 D	2007_35	16	19	2	13	15	4	34	11	476	0	0	0	0	7	2	1	5	1	1
2007	Main	250	D	M 250 D	2007_36	2	2	0	0	1	0	3	6	0	0	0	0	0	2	0	0	0	0	0
2007	Wall	750	D	W 750 D	2007_38	5	17	0	6	10	3	42	20	334	3	0	0	0	17	4	0	0	1	0
2007	Main	250	N	M 250 N	2007_41	5	1	0	0	2	0	13	35	683	53	0	0	0	25	148	0	0	0	0
2007	Main	750	N	M 750 N	2007_42	2	13	0	6	6	2	29	5	1069	54	0	4	0	64	65	0	0	0	0
2007	Main	250	N	M 250 N	2007_43	3	0	0	0	0	0	7	55	1042	69	0	0	0	21	114	0	0	0	0
2007	Head	750	D	H 750 D	2007_44	0	9	3	13	1	2	5	9	64	1	0	8	0	13	3	0	0	0	2
2007	Head	250	D	H 250 D	2007_45	0	0	0	0	0	0	0	7	0	0	0	0	0	6	2	0	0	0	0
2007	Head	750	N	H 750 N	2007_49	0	3	0	2	3	1	1	10	153	15	0	5	0	24	0	0	0	0	1
2007	Head	250	N	H 250 N	2007_51	0	0	0	0	1	0	2	4	6	4	0	0	0	3	0	0	0	0	0
2007	Head	750	N	H 750 N	2007_52	0	2	0	2	0	0	1	11	66	2	0	10	0	8	0	0	0	0	1
2007	Wall	250	D	W 250 D	2007_53	0	0	0	0	0	0	0	2	1	1	0	0	0	7	0	0	0	0	0
2007	Wall	750	D	W 750 D	2007_54	1	8	2	15	7	1	20	21	423	1	0	2	0	24	2	0	1	1	10
2007	Wall	750	D	W 750 D	2007_56	1	7	1	7	0	3	23	15	370	1	0	0	0	16	1	0	0	0	7
2007	Wall	250	N	W 250 N	2007_58	1	2	0	0	0	0	6	10	147	34	0	0	0	10	0	0	0	0	0
2007	Wall	750	N	W 750 N	2007_59	7	9	0	4	4	5	15	4	266	7	0	1	0	12	3	0	0	0	0
2007	Wall	250	N	W 250 N	2007_60	4	0	1	0	0	0	6	8	108	31	0	0	0	16	15	0	0	0	2
2007	Wall	750	N	W 750 N	2007_61	1	8	4	2	1	5	14	6	307	17	0	0	0	3	12	0	0	0	6
2007	Deep	750	D	D 750 D	2007_62	10	24	1	10	13	3	21	7	356	0	0	1	0	5	0	1	5	0	1
2007	Deep	1250	D	D 1250 D	2007_64	19	37	4	10	24	4	28	4	240	0	0	0	0	1	1	0	35	0	0
2007	Deep	750	D	D 750 D	2007_65	12	16	0	17	15	0	18	1	369	3	0	0	0	6	1	0	9	1	0
2007	Deep	250	D	D 250 D	2007_67	0	0	0	0	0	0	0	0	0	0	0	0	1	1	0	0	0	0	0
2007	Deep	250	N	D 250 N	2007_69	6	1	0	0	9	0	4	11	236	24	0	0	0	31	29	0	0	0	0
2007	Deep	1250	N	D 1250 N	2007_70	5	24	7	16	25	3	17	4	742	15	0	4	0	21	34	0	41	1	0
2007	Deep	750	N	D 750 N	2007_71	15	24	4	10	31	5	22	13	440	26	0	4	0	16	25	0	21	0	0
2007	Deep	1250	N	D 1250 N	2007_72	15	29	6	8	16	5	19	6	465	17	0	0	0	34	32	0	36	3	0
2007	Deep	750	N	D 750 N	2007_76	17	28	2	10	24	1	42	15	657	23	0	5	0	25	37	0	17	0	0
2007	Deep	250	N	D 250 N	2007_77	12	1	0	0	6	0	15	12	285	33	0	0	0	15	74	0	0	0	0
2007	Main	>1250	D	M Extra D	2007_80	8	16	4	28	11	1	22	10	700	1	0	11	0	8	4	0	11	0	0
2007	Head	750	D	H 750 D	2007_81	3	5	1	19	3	2	6	5	161	0	0	7	0	6	2	0	0	0	5
2007	Head	>750	N	H Extra N	2007_83	0	7	1	25	3	4	26	4	342	3	0	18	0	24	0	0	0	0	5
2007	Head	250	N	H 250 N	2007_84	1	0	0	0	0	0	2	5	67	0	0	0	0	3	0	0	0	0	1
2007	Head	250	N	H 250 N	2007_85	0	0	0	0	0	0	0	7	32	1	0	0	0	4	1	0	0	0	2
2007	Head	750	D	H 750 D	2007_86	0	2	0	2	1	0	0	34	132	1	0	15	0	9	1	0	0	0	2
2008	Deep	750	N	D 750 N	2008_01	7	8	0	9	26	4	10	33	638	7	64	1	5	5	0	67	16	0	0
2008	Deep	750	D	D750 D	2008_02	14	1	0	5	2	3	29	13	209	1	4	2	1	0	0	9	1	1	0
2008	Deep	1250	N	D 1250 N	2008_06	8	18	2	6	21	4	16	32	885	13	25	3	1	6	4	82	88	0	0
2008	Deep	250	N	D 250 N	2008_07	25	1	0	3	22	0	6	79	514	5	30	1	2	2	4	51	0	0	0
2008	Deep	1250	D	D 1250 D	2008_08	16	24	7	14	43	3	21	14	298	1	1	0	3	0	0	18	74	2	0
2008	Deep	750	N	D 750 N	2008_11	7	11	0	5	22	2	10	17	342	6	26	0	3	1	0	65	20	1	0
2008	Main	1250	D	M 1250 D	2008_14	10	17	4	9	28	5	19	15	275	1	0	10	0	8	5	8	22	1	1
2008	Main	750	D	M 750 D	2008_15	10	11	0	8	3	0	13	8	146	1	0	0	0	0	1	1	2	1	10
2008	Main	750	N	M 750 N	2008_19	9	14	0	14	8	2	15	10	607	13	1	0	0	3	6	1	1	0	9
2008	Main	1250	N	M 1250 N	2008_20	13	45	0	21	24	9	20	9	210	17	9	7	1	7	3	72	18	0	3
2008	Main	250	N	M 250 N	2008_21	5	0	0	1	2	0	5	13	1144	16	0	0	2	2	27	4	0	0	0
2008	Main	250	D	M 250 D	2008_22	3	0	0	0	0	3	0	0	53	1	0	0	0	0	1	0	0	0	0
2008	Head	750	D	H 750 D	2008_23	0	12	2	5	2	0	8	3	55	0	0	2	0	5	3	0	1	0	12
2008	Head	250	N	H 250 N	2008_27	0	0	0	0	0	0	0	0	15	0	0	0	0	1	0	0	0	0	0
2008	Head	750	N	H 750 N	2008_28	0	15	5	14	2	4	0	6	21	6	0	4	0	2	0	0	1	0	2
2008	Head	250	N	H 250 N	2008_29	0	0	0	0	0	0	0	2	1	0	0	0	0	0	0	0	0	0	0
2008	Head	750	D	H 750 D	2008_31	0	10	4	8	5	4	2	6	25	0	0	4	0	1	0	0	2	0	2
2008	Head	250	D	H 250 D	2008_32	0	0	0	0	0	1	1	0	0	0	0	0	0	0	10	0	0	0	0
2008	Main	750	N	M 750 N	2008_36	8	9	0	8	2	0	34	16	1087	13	8	0	1	1	21	22	4	0	0
2008	Main	1250	N	M 1250 N	2008_37	10	22	1	16	18	4	38	7	611	11	44	0	3	11	14	35	9	0	5
2008	Main	250	N	M 250 N	2008_38	11	1	0	1	0	0	13	18	376	4	1	0	0	0	6	1	0	0	0
2008	Main	750	D	M 750 D	2008_39	15	10	0	15	0	3	39	24	311	3	5	1	0	5	7	1	1	0	0
2008	Deep	750	N	D 750 N	2008_43	14	27	0	8	43	4	15	26	201	29	82	2	26	0	7	21	26	1	0
2008	Deep	250	N	D 250 N	2008_44	15	5	0	1	21	2	9	53	255	25	76	0	14	4	39	32	3	0	0
2008	Deep	750	D	D 750 D	2008_46	17	28	0	7	52	6	25	17	162	3	21	2	4	1	1	3	6	0	0
2008	Deep	250	D	D 250 D	2008_47	4	0	0	0	1	0	3	1	10	0	0	0	0	0	0	0	0	0	0
2008	Deep	1750	N	D 1750 N	2008_49	14	32	6	13	17	9	19	12	231	4	72	16	12	4	15	15	33	0	0
2008	Deep	1250	N	D 1250 N	2008_51	8	24	5	6	28	3	16	18	127	20	57	5	18	5	15	11	27	0	0
2008	Deep	1250	D	D 1250 D	2008_52	26	40	13	16	53	9	28	19	178	12	7	3	26	1	2	3	51	0	0
2008	Main	1250	D	M 1250 D	2008_53	23	10	3	15	18	5	44	6	208	4	8	8	0	3	4	0	9	2	0
2009	Slope	750	D	S 750 D	2009_03	17	26	0	3	65	2	26	17	339	0	18	0	19	4	0	3	6	0	0
2009	Deep	1750	N	D 1750 N	2009_04	11	53	8	26	31	3	15	11	666	12	4	10	66	2	0	41	53	1	0
2009	Deep	750	N	D 750 N	2009_05	15	44	0	0	30	0	53	4	246	10	154	1	166	8	0	106	12	0	0
2009	Deep	1250	D	D 1250 D	2009_06	23	82	4	22	46	5	44	27	348	1	20	2	27	4	0	19	100	3	1
2009	Deep	250	N	D 250 N	2009_10	13	9	0	2	13	0	16	82	678	73	187	0	157	5	67	26	3	0	0
2009	Deep	1250	N	D 1250 N	2009_11	16	48	6	19	23	0	42	12	385	9	176	0	162	6	0	52	42	1	0
2009	Deep	750	N	D 750 N	2009_12	17	20	1	23	24	0	38	18	454	9	87	0	25	7	0	57	6	0	0
2009	Deep	250	D	D 250 D	2009_13	8	0	0	0	0	0	5	0	31	0	7	0	0	0	0	0	0	0	0
2009	Main	250	N	M 250 N	2009_17	5	2	0	0	0	0	1	16	613	34	1	0	1	16	12	0	0	0	0
2009	Main	750	N	M 750 N	2009_18	9	14	0	8	5	2	18	26	502	20	1	0	2	12	8	0	3	0	0
2009	Main	1250	N	M 1250 N	2009_19	17	33	2	21	19	2	16	11	661	2	0	0	5	4	4	6	46	2	1
2009	Deep	1250	D	D 1250 D	2009_20	14	57	3	26	58	1	92	15	527	0	43	0	75	3	9	6	85	0	0
2009	Main	250	N	M 250 N	2009_25	21	1	0	0	0	0	7	8	683	27	1	0	1	16	27	0	0	0	0
2009	Deep	1250	N	D 1250 N	2009_26	9	57	2	23	34	0	24	17	683	13	32	3	126	0	54	0	52	0	0
2009	Main	750	N	M 750 N	2009_27	27	14	1	12	16	0	36	4	606	4	0	0	6	18	13	0	2	0	0
2009	Deep	1750	N	D 1750 N	2009_32	9	57	8	21	31	1	41	17	747	7	45	9	108	0	26	8	56	0	0
2009	Wall	250	N	W 250 N	2009_33	14	5	1	0	5	0	3	15	639	9	1	1	4	54	69	0	0	0	0
2009	Main	250	D	M 250 D	2009_34	8	0	0	0	0	0	0	1	23	0	0	0	0	6	12	0	0	0	0
2009	Main	750	D	M 750 D	2009_35	34	5	0	6	11	1	37	8	280	0	0	1	1	33	11	0	0	0	0
2009	Deep	>1750		D Extra X	2009_38	10	81	3	24	42	3	21	13	557	19	86	6	147	0	6	63	59	4	0
2009	Main	1250	N	M 1250 N	2009_39	21	37	7	15	24	3	24	2	864	16	1	3	1	7	11	0	40	1	0
2009	Main	750	D	M 750 D	2009_40	48	12	1	7	15	1	43	3	317	1	0	0	1	18	2	0	0	0	1
2009	Wall	750	D	W 750 D	2009_41	22	8	1	9	6	0	52	5	274	3	0	0	0	27	4	0	1	0	6
2009	Deep	>1750		D Extra X	2009_43	15	40	8	14	47	0	15	7	367	2	17	5	102	0	0	29	43	1	0
2009	Wall	750	N	W 750 N	2009_44	27	11	2	7	1	2	29	7	332	29	0	0	2	47	28	0	0	0	4
2009	Wall	750	N	W 750 N	2009_45	30	10	0	9	1	2	34	1	559	9	0	0	0	47	25	0	1	0	1
2009	Main	1250	D	M 1250 D	2009_46	47	27	12	29	22	7	30	4	347	1	0	2	0	15	1	0	32	1	1
2009	Head	250	N	H 250 N	2009_52	8	1	2	1	1	0	6	1	15	0	0	0	0	3	0	0	0	0	0
2009	Head	750	N	H 750 N	2009_54	2	16	4	8	3	5	0	5	79	0	0	4	0	3	3	0	9	1	11
2009	Head	250	N	H 250 N	2009_55	3	1	0	0	2	0	0	1	0	0	0	0	0	0	0	0	0	0	0
2009	Head	750	D	H 750 D	2009_56	0	4	4	12	1	1	0	17	121	0	0	4	0	4	0	0	0	1	12
2009	Head	250	D	H 250 D	2009_57	0	0	0	0	0	0	1	0	1	0	0	1	0	7	0	0	0	0	1
2009	Head	750	D	H 750 D	2009_58	1	11	7	9	2	8	0	16	37	0	0	11	0	0	0	0	0	0	18
2010	Slope	750	D	S 750 D	2010_02	13	57	5	7	31	3	8	3	94	3	0	2	1	0	0	0	1	1	0
2010	Deep	250	N	D 250 N	2010_04	12	4	0	0	3	0	13	25	721	5	0	0	0	0	0	0	0	0	0
2010	Deep	750	N	D 750 N	2010_05	9	12	0	3	13	8	9	5	505	0	0	0	0	0	0	0	8	0	0
2010	Deep	250	N	D 250 N	2010_06	7	3	0	0	1	0	2	0	3	0	0	0	0	0	0	0	0	0	0
2010	Main	750	D	M 750 D	2010_08	4	16	1	6	4	0	1	0	137	0	0	0	0	0	0	0	1	0	0
2010	Main	250	D	M 250 D	2010_09	8	1	0	0	0	0	0	4	1	0	0	0	0	0	0	0	0	0	0
2010	Main	750	D	M 750 D	2010_10	10	16	0	9	11	2	8	5	294	1	0	0	0	0	0	0	5	0	0
2010	Deep	1250	N	D 1250 N	2010_11	19	58	6	10	27	3	9	22	473	1	0	0	0	2	0	0	25	1	0
2010	Main	1250	D	M 1250 D	2010_14	36	55	2	13	16	6	3	4	115	0	0	0	0	0	0	0	7	1	2
2010	Deep	750	N	D 750 N	2010_16	13	22	4	11	19	5	11	15	207	1	0	0	0	0	0	0	12	1	0
2010	Deep	250	N	D 250 N	2010_17	26	11	1	0	3	0	5	10	157	4	0	0	0	0	0	0	3	0	0
2010	Deep	1250	N	D 1250 N	2010_18	15	18	2	16	19	4	5	1	117	0	0	1	0	0	0	0	21	1	0
2010	Head	250	D	H 250 D	2010_22	13	4	0	0	1	0	0	0	15	0	0	0	0	0	1	0	0	0	1
2010	Main	250	N	M 250 N	2010_23	22	1	0	0	3	0	5	12	1001	2	0	1	0	0	0	0	0	0	1
2010	Main	750	N	M 750 N	2010_24	19	15	0	16	13	1	9	4	468	1	0	3	0	0	0	0	1	0	1
2010	Main	1250	N	M 1250 N	2010_25	40	44	4	14	15	5	4	2	259	1	0	0	0	0	1	0	5	1	1
2010	Head	750	D	H 750 D	2010_29	19	2	0	2	1	0	0	1	3	0	0	0	0	0	0	0	0	0	1
2010	Head	750	D	H 750 D	2010_30	3	0	3	0	0	0	0	1	0	0	0	0	0	0	0	0	0	0	0
2010	Main	750	N	M 750 N	2010_31	4	14	1	5	13	2	2	1	152	0	0	0	0	0	0	0	2	0	0
2010	Main	250	N	M 250 N	2010_32	6	0	0	0	0	0	0	4	190	0	0	0	0	0	0	0	0	0	0
2010	Main	1250	N	M 1250 N	2010_33	15	32	4	9	11	2	4	4	177	0	0	0	0	0	0	0	8	0	3
2010	Deep	>1750	D	D Extra D	2010_35	14	28	13	22	28	3	2	3	192	0	0	0	0	0	1	0	17	2	0
2010	Head	750	N	H 750 N	2010_36	7	6	2	0	7	1	2	0	6	0	0	0	0	0	0	0	0	0	1
2010	Head	250	N	H 250 N	2010_39	2	1	0	0	0	0	0	0	0	0	0	0	0	0	0	0	0	0	1
2010	Head	750	N	H 750 N	2010_40	12	6	0	1	1	0	0	0	2	0	0	0	0	0	0	0	0	0	3
2010	Deep	1750	D	D 1750 D	2010_43	10	66	6	24	32	1	7	0	219	2	0	0	0	0	0	0	19	0	1
2010	Deep	750	D	D 750 D	2010_44	12	56	0	13	30	2	9	1	249	0	0	0	0	0	0	0	7	0	0
2010	Deep	1750	N	D 1750 N	2010_45	13	140	1	21	54	4	13	2	609	2	0	23	0	0	0	0	16	1	0
2010	Head	250	N	H 250 N	2010_46	7	12	1	0	8	0	5	1	32	1	0	0	0	0	0	0	0	0	0
2010	Deep	1750	D	D 1750 D	2010_50	16	126	6	27	45	12	4	0	323	0	0	0	0	0	0	0	45	3	0
2010	Deep	1750	N	D 1750 N	2010_51	14	145	8	23	61	6	10	16	764	1	0	0	0	0	0	0	23	1	0
